# Supplementary material
Source: publisher figshare collection journal article supplement (https://gsajournals.figshare.com/ndownloader/files/13471559)
Supplement: Supplementary file 1 [file 13471559]

## Sheet: Table S5
	Table S5: Short-read sequencing, filtering and mapping results
	Growth stage	Replicate	Sequenced reads	Filtered high-quality reads	Reads mapping on Cabernet Sauvignon genome annotation		Reads mapping on Iso-Seq non-redundant transcriptome
	Pre-véraison	1	23741467	23717119	21728649	0.916159	20767694	0.875642
		2	24986728	24960574	22898294	0.917379	21763094	0.871899
		3	25144325	25120885	22799064	0.907574	22163439	0.882271
		4	21947976	21926471	19973000	0.910908	18900308	0.861986
	Véraison	1	34165585	34132686	31051133	0.909718	29942398	0.877235
		2	25439487	25414551	23200485	0.912882	22440813	0.882991
		3	26458159	26430961	24149465	0.913681	23218887	0.878473
		4	23863292	23837752	21799568	0.914498	21114157	0.885744
	Post-véraison	1	26270669	26243671	23747680	0.904892	22935861	0.873958
		2	20275879	20255656	18237016	0.900342	17616210	0.869693
		3	24577195	24551564	22111818	0.900628	21348171	0.869524
		4	29511127	29482945	26660886	0.904282	25833070	0.876204
	Harvest	1	21797263	21777065	19561716	0.898271	18877769	0.866865
		2	27928233	27900044	25033614	0.897261	24153853	0.865728
		3	24270106	24245732	21569994	0.889641	20747364	0.855712
		4	30523102	30494660	27414553	0.898995	26349846	0.864081
	Average		2.56813e+07	25655771	2.32461e+07	0.906069	2.23858e+07	0.872375
	Standard deviation		3.51609e+06	3.51298e+06	3.18759e+06	0.00803911	3.10336e+06	0.0082563
